# Supplementary material
Source: PubMed Central journal article supplement (PMC2948807)
Supplement: mmc1.pdf [file mmc1.pdf]

The American Journal of Human Genetics, Volume 87

## **Supplemental Data**

### **Mutations in the *SPTLC2* Subunit**

### **of Serine Palmitoyltransferase Cause**

### **Hereditary Sensory and Autonomic Neuropathy Type I**

Annelies Rothier, Michaela Auer-Grumbach, Katrien Janssens, Jonathan Baets, Anke Penno, Leonardo Almeida-Souza, Kim Van Hoof, An Jacobs, Els De Vriendt, Beate Schlotter-Weigel, Wolfgang Löscher, Petr Vondráček, Pavel Seeman, Peter De Jonghe, Patrick Van Dijck, Alben Jordanova, Thorsten Hornemann, and Vincent Timmerman

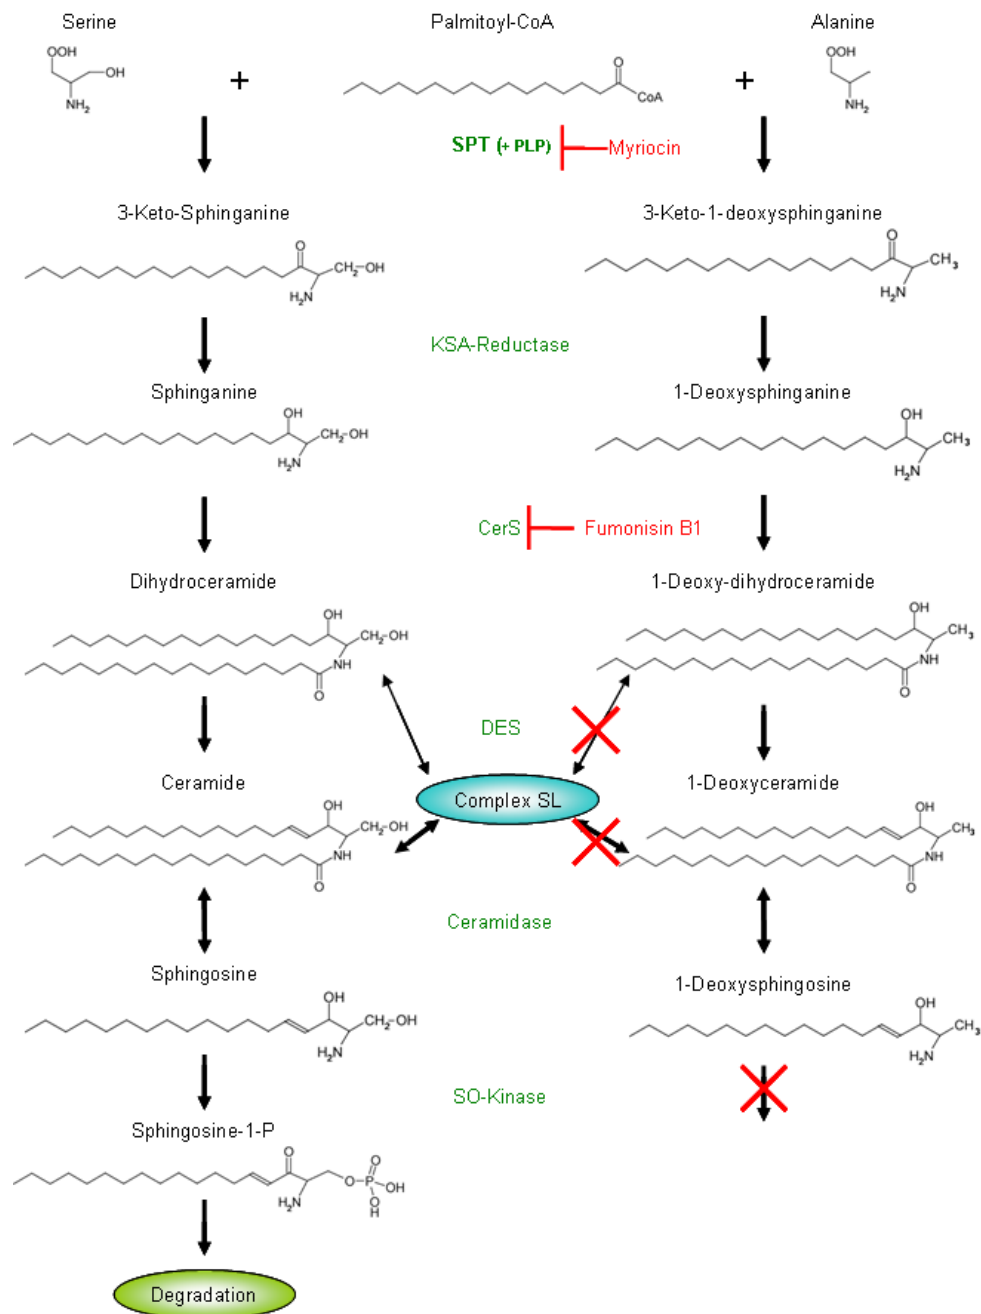

### Figure S1. De Novo Sphingolipid Biosynthesis Pathway

Left: the canonical pathway with L-serine; right the alternative, disease-related pathway with L-alanine. Condensation with L-alanine instead of L-Serine gives rise to a metabolite lacking the C<sub>1</sub> hydroxyl group, obstructing conversion to complex SLs and degradation. The enzymes of the pathway are denoted in green. Myriocin and Fumonisin B1 are mycotoxins inhibiting the enzymes SPT and CerS respectively. SPT: serine palmitoyltransferase; PLP: pyridoxal-5'-phosphate; KSA: 3-keto-sphinganine; CerS: Ceramide synthase; DES: dihydroceramide desaturase; SO: sphingosine; SL: sphingolipids.

**Table S1. Exon Primers Used for PCR and Direct Sequencing of *SPTLC2***

|                | Forward primer (5'-3')      | Reverse primer (5'-3')       |
|----------------|-----------------------------|------------------------------|
| Exon 1         | gcagccatttccggtttc          | ggattgccagcggatgg            |
| Exon 2         | ttacaggtgtgagccagtgc        | tgtcaaaaataactaagatttc       |
| Exon 3         | cacaatcttgacgtaatgaaa       | cctcagctgctactcctatttg       |
| Exon 4         | tctgcttcttttgtgtcacc        | tcagaaaaacaaagcattctca       |
| Exon 5         | agtctgaaaaggacacaacaca      | gctcactctgactgcttttcaa       |
| Exon 6         | tgatcactgtgctgttgtgc        | aagactggaccggaagaacat        |
| Exon 7         | tgaggcatggtttctgaatg        | tgctgactctgtttccaggt         |
| Exon 8         | acttcagcctggacaatgga        | gagcctaaaccagaggcaaa         |
| Exon 9         | gaccatgttggtgacctgt         | gtccatggaaccacacacc          |
| Exon 10        | aaatattttatggtgaaatggaaaa   | tgcatatgtaccaaataagagg       |
| Exon 11        | gcctgcacaccaaagagtt         | cactgtcaccctctgtct           |
| <i>Exon 12</i> | <i>cctgccgaaggataatcttg</i> | <i>gcaaaggaaggattagaagca</i> |

**Table S2. Exon Primers Used for PCR and Direct Sequencing of *SPTLC3***

|                | Forward primer (5'-3')     | Reverse primer (5'-3')          |
|----------------|----------------------------|---------------------------------|
| Exon 1         | caaacgggtgcagagacc         | aaccctcataagatgaactcta          |
| Exon 2         | taacaggagaatgctaacctt      | cacttagagaggagtaggc             |
| Exon 3         | agataaccttctacctctgttctaa  | ttgtcatctagtggccat              |
| Exon 4         | gaatcgtgcataatcctgg        | agagacagacacaaggaat             |
| Exon 5         | aatcttggccttgttga          | tctaacaaggacctactcaga           |
| Exon 6         | ctgtccccacaagttgttt        | gtcacctgaagagcagaa              |
| Exon 7         | ttaggtctgagtgtgaacata      | tctgttagctaggaaagggtga          |
| Exon 8         | ggagggtattgttagtta         | ggtgtggtgaactgaattg             |
| Exon 9         | agggatgggactagatgta        | gggagattaatgaggcagaa            |
| Exon 10        | atgcttccaagttgac           | cataatctaacgcctgtgc             |
| Exon 11        | catattcctttttgtcag         | taaataaccaagagaaac              |
| <i>Exon 12</i> | <i>gctattaatctgggctctg</i> | <i>ggagaaatccatttatattccttg</i> |

**Table S3. Sequences of Primers Used for Cloning and Site-Directed Mutagenesis**

|                      | Primer sequence (5'-3')                                                                                                              |
|----------------------|--------------------------------------------------------------------------------------------------------------------------------------|
| SPTLC2_attb1         | gggacaagtttgtaaaaaagcaggctatgcggccggagcccggaggetgct                                                                                  |
| SPTLC2_attb2         | ggggaccactttgtacaagaaagctgggtccgtcttctgtttcttcatacgtc                                                                                |
| SPTLC2_V359M_fw      | ccacaggccggggtatggtggagtac                                                                                                           |
| SPTLC2_V359M_rv      | gtactccaccataccccggcctgtgg                                                                                                           |
| SPTLC2_G382V_fw      | gaacgttcacaaagagttttgttctctggaggatattgg                                                                                              |
| SPTLC2_G382V_rv      | ccaatatacctccagaagcaaaaaactctttgtgaacgttc                                                                                            |
| SPTLC2_I504F_fw      | ttctgccacccaattttgagtccagagcc                                                                                                        |
| SPTLC2_I504F_rv      | ggctctggactcaaaaattggggtggcaggaa                                                                                                     |
| LCB2_HA_fw           | gccactacctgagcccgtgtcagcgtagtctgggacgtcgtatgggtaagcgtagtctg<br>ggacgtcgtatgggtaagcgtagtctgggacgtcgtatgggtagacaccctccttatta<br>catttc |
| LCB2_HA_rv           | gaaatgtaataaggaggggtgtctaccatacgcgtcccagactacgcttaccatacgc<br>acgtcccagactacgcttaccatacgcgtcccagactacgctgacaacgggctcagg<br>tagtggc   |
| LCB2_V346M_fw        | gcccactggtcgcggtatgtgtgaaatatttggcg                                                                                                  |
| LCB2_V346M_rv        | cgccaaatatttcacacataccgcgaccagtgggc                                                                                                  |
| LCB2_G369V_fw        | gtactttcactaagtcgtttgttctgctggtggttacattg                                                                                            |
| LCB2_G369V_rv        | caatgtaaccaccagcagcaacaacgacttagtgaaagtac                                                                                            |
| LCB2_I491F_fw        | cttactctgctactccgctgtttgaatcaagagtaagattctg                                                                                          |
| LCB2_I491F_rv        | cagaatcttactcttgattcaaacagcggagtagcaggataag                                                                                          |
| LCB2_K366T_fw        | ctaagggtactttcactacttcgtttggctgctgctggtg                                                                                             |
| <i>LCB2_K366T_rv</i> | caccagcagcaccaaacgaagtagtgaaagtaccattag                                                                                              |
